# Supplementary material for: freeQuant: A Mass Spectrometry Label‐Free Quantification Software Tool for Complex Proteome Analysis
Source: Hindawi journal article supplement (doi:10.1155/2015/137076), 2015-01-01
Supplement: f1 [file 137076.f1.pdf]

# **freeQuant: a mass spectrometry label-free quantification software tool for complex proteome analysis**

## **Supplement**

**Ning Deng<sup>1§</sup>, Zhenye Li<sup>2</sup>, Chao Pan<sup>1</sup>, Huilong Duan<sup>1</sup>**

<sup>1</sup> Department of Biomedical Engineering, Key Laboratory for Biomedical Engineering of Ministry of Education, Zhejiang University, Hangzhou 310027, China

<sup>2</sup> General Hospital of Ningxia Medical University, Yinchuan 750004, China

**<sup>§</sup>Correspondence:**

Ning Deng

Department of Biomedical Engineering

Key Laboratory for Biomedical Engineering of Ministry of Education,  
Zhejiang University, Hangzhou, 310027, China.

## Supplementary Tables

**Table S1-The Top 10 Most Abundant Proteins in Human Heart Mitochondrial Dataset**

| Rank | IPI         | Gene    | Function              | Rank<br>Mouse Heart | Rank<br>Mouse Liver |
|------|-------------|---------|-----------------------|---------------------|---------------------|
| 1    | IPI00303476 | ATP5B   | ETC complex           | 1                   | 3                   |
| 2    | IPI00440493 | ATP5A1  | ETC complex           | 2                   | 4                   |
| 3    | IPI00022314 | SOD2    | Redox                 | 32                  | 27                  |
| 4    | IPI00017855 | ACO2    | Metabolism            | 3                   | 55                  |
| 5    | IPI00015141 | CKMT2   | Transport             | 14                  | 14                  |
| 6    | IPI00022891 | SLC25A4 | Transport             | 5                   | 59                  |
| 7    | IPI00007188 | SLC25A5 | Transport, Apoptosis  | 121                 | 36                  |
| 8    | IPI00015911 | DLD     | TCA cycle             | 222                 | 631                 |
| 9    | IPI00337541 | NNT     | Metabolism            | 7                   | 202                 |
| 10   | IPI00291006 | MDH2    | TCA cycle, Metabolism | 4                   | 17                  |

**Table S2-The Top 10 Most Abundant Proteins in Mouse Heart Mitochondrial Dataset**

| Rank | IPI         | Gene    | Function              | Rank<br>Human Heart | Rank<br>Mouse Liver |
|------|-------------|---------|-----------------------|---------------------|---------------------|
| 1    | IPI00468481 | Atp5b   | ETC complex           | 1                   | 3                   |
| 2    | IPI00130280 | Atp5a1  | ETC complex           | 2                   | 4                   |
| 3    | IPI00116074 | Aco2    | TCA cycle             | 5                   | 45                  |
| 4    | IPI00323592 | Mdh2    | Metabolism            | 14                  | 14                  |
| 5    | IPI00115564 | Slc25a4 | Transport             | 7                   | 48                  |
| 6    | IPI00223092 | Hadha   | Fatty Acid Metabolism | 15                  | 16                  |
| 7    | IPI00309964 | Nnt     | OXPHOS                | 13                  | 163                 |
| 8    | IPI00119203 | Acadv1  | Metabolism            | 25                  | 23                  |
| 9    | IPI00230351 | SdhA    | OXPHOS                | 180                 | 41                  |
| 10   | IPI00226430 | Acaa2   | Metabolism            | 73                  | 2                   |

**Table S3-The Top 10 Most Abundant Proteins in Mouse Liver Mitochondrial Dataset**

| Rank | IPI         | Gene   | Function              | Rank<br>Mouse Heart | Rank<br>Human Heart |
|------|-------------|--------|-----------------------|---------------------|---------------------|
| 1    | IPI00111908 | Cps1   | Urea cycle            | 999                 | 1004                |
| 2    | IPI00226430 | Acaa2  | Fatty Acid Metabolism | 10                  | 65                  |
| 3    | IPI00468481 | Atp5b  | ETC complex           | 1                   | 1                   |
| 4    | IPI00130280 | Atp5a1 | ETC complex           | 2                   | 2                   |
| 5    | IPI00420718 | Hmgcs2 | TCA cycle             | N/D                 | N/D                 |
| 6    | IPI00116753 | EtfA   | ETC complex           | 27                  | 36                  |
| 7    | IPI00308885 | Hspd1  | Binding               | 15                  | 23                  |
| 8    | IPI00111218 | Aldh2  | Redox                 | 200                 | 91                  |
| 9    | IPI00114710 | Pcx    | Binding               | 114                 | 824                 |
| 10   | IPI00230507 | Atp5h  | ETC complex           | 12                  | 13                  |

**Table S4- The top 30 most interactions proteins in mitochondrial interactome**

| Protein Name | Degree of Interaction | Relative Abundance | Rank of Abundance (%) | Function     |
|--------------|-----------------------|--------------------|-----------------------|--------------|
| ICT1         | 143                   | 0.00039753         | 16.3                  | Biosynthesis |
| NDUFAB1      | 79                    | 0.000017185        | 53.87                 | ETC Complex  |
| ALDOA        | 69                    | 0.000007367        | 69.67                 | Binding      |
| ACADVL       | 63                    | 0.016066891        | 0.566                 | Redox        |
| NDUFA2       | 41                    | 0.000257252        | 20.2                  | ETC Complex  |
| C1qbp        | 33                    | 0.000779924        | 11.64                 | Binding      |
| COX4I1       | 30                    | 0.006068686        | 2.20                  | ETC Complex  |
| IMMT         | 30                    | 0.004301678        | 3.65                  | Binding      |
| ACAD9        | 27                    | 0.000792398        | 11.45                 | Redox        |
| HSPD1        | 27                    | 0.011790555        | 0.97                  | Binding      |
| MRPL10       | 23                    | 0.000121663        | 27.88                 | Biosynthesis |
| ATP5F1       | 22                    | 0.006868338        | 1.96                  | ETC Complex  |
| SLC25A13     | 22                    | 0.005681322        | 2.52                  | Transport    |
| COX6C        | 21                    | 0.000264556        | 19.76                 | ETC Complex  |
| SDHA         | 19                    | 0.01555497         | 0.566                 | ETC Complex  |
| NDUFS3       | 19                    | 0.003925022        | 3.84                  | ETC Complex  |
| MT-CO2       | 18                    | 0.006538737        | 2.08                  | ETC Complex  |
| ATP5B        | 17                    | 0.066614011        | 0.063                 | ETC Complex  |
| MRPL16       | 17                    | 0.000017704        | 53.37                 | Biosynthesis |
| ATP5A1       | 14                    | 0.044037116        | 0.126                 | ETC Complex  |
| NDUFS2       | 14                    | 0.003784353        | 4.09                  | ETC Complex  |
| NDUFAF1      | 14                    | 0.000081823        | 32.47                 | ETC Complex  |
| CYC1         | 14                    | 0.002803127        | 5.48                  | ETC Complex  |
| VDAC1        | 13                    | 0.000061074        | 36.69                 | Apoptosis    |
| UQCRC1       | 13                    | 0.011025876        | 1.01                  | ETC Complex  |
| SLC25A5      | 13                    | 0.0015723          | 7.61                  | Apoptosis    |
| COX6A2       | 12                    | 0.000165825        | 24.42                 | ETC Complex  |
| COX5A        | 11                    | 0.00326276         | 4.91                  | ETC Complex  |
| UQCRCF1      | 10                    | 0.002505937        | 5.92                  | ETC Complex  |
| NDUFV2       | 10                    | 0.00240998         | 6.36                  | ETC Complex  |

## Supplementary Figures

**Figure S1– The Main Framework of freeQuant**

freeQuant consists of four parts: data loading, quantification, functional analysis and results displaying.

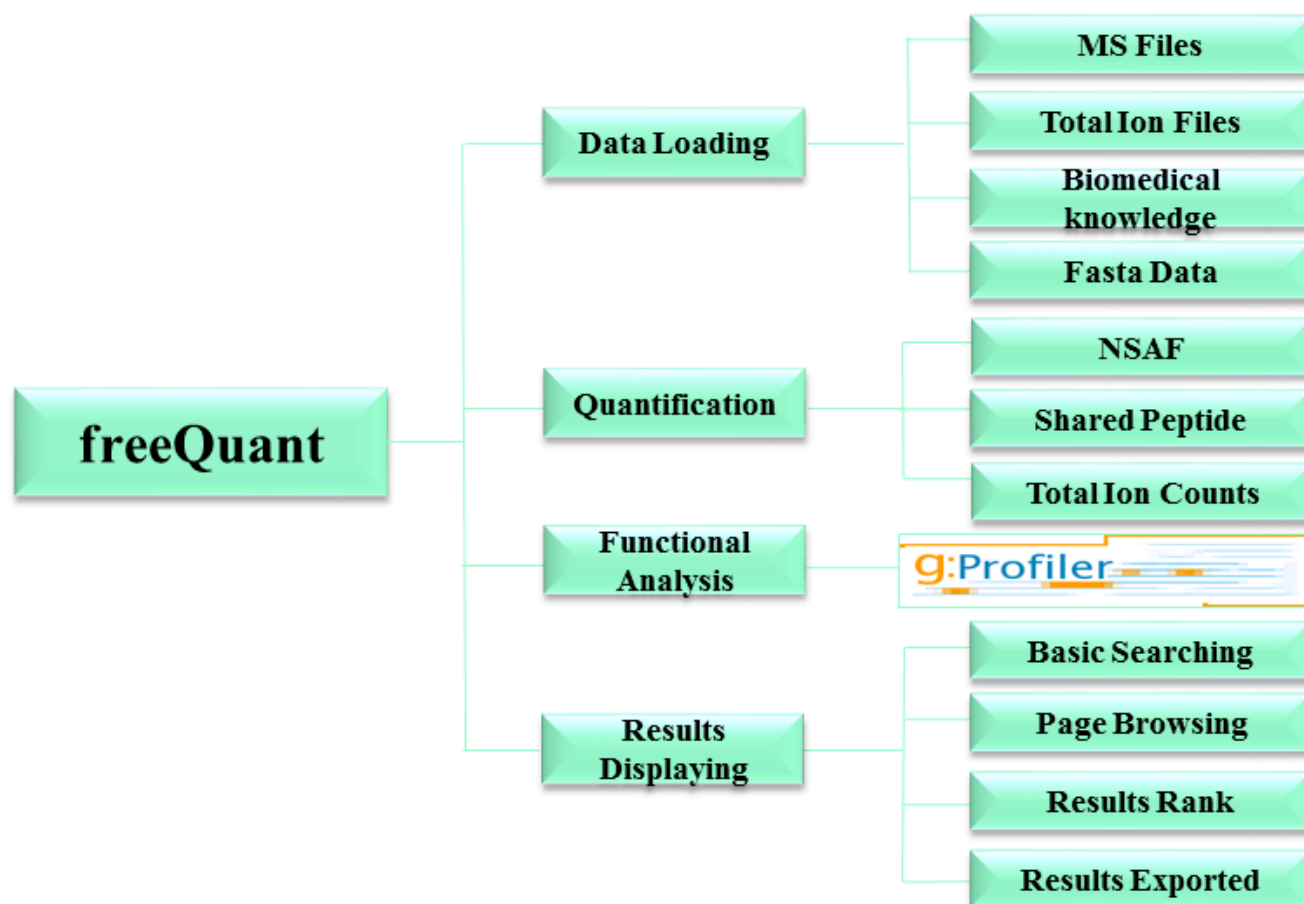

**Figure S2– The Workflow of Data Acquisition and Preparation**

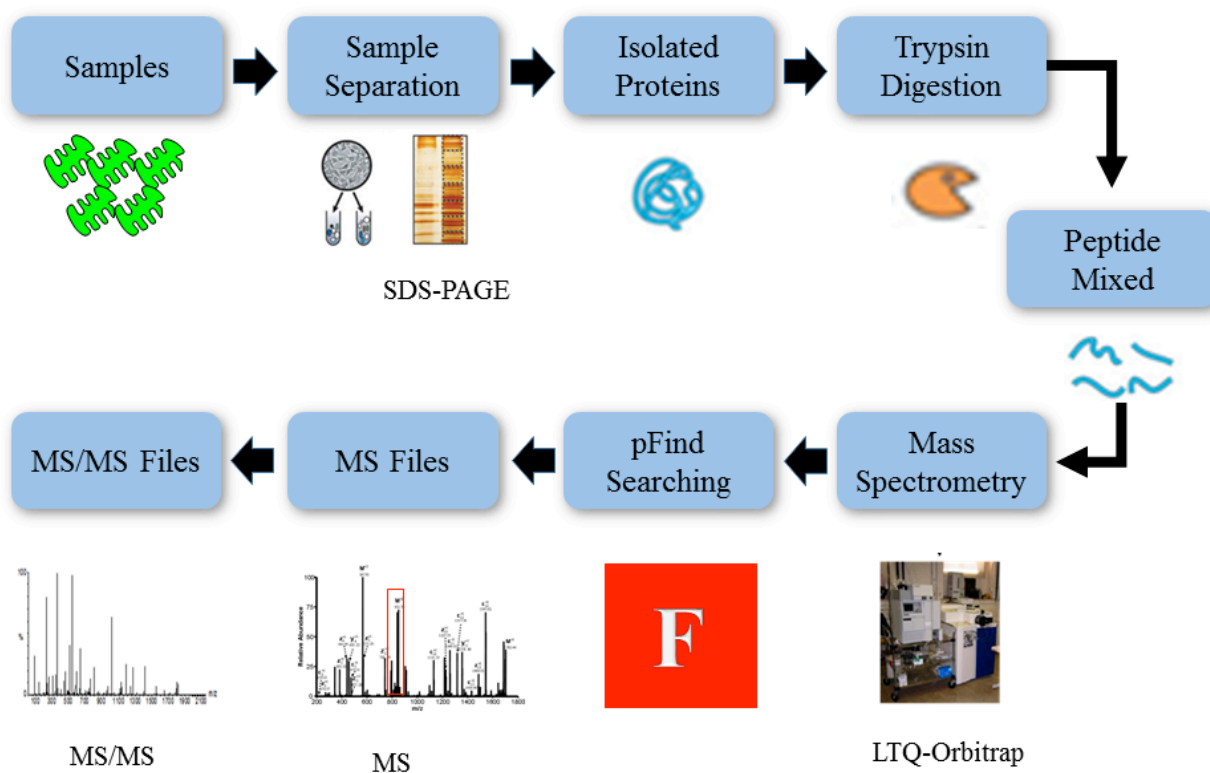

### Figure S3– The Analysis of Proteins with Shared Peptides in 4 Groups

Four groups of mouse heart mitochondrial proteins were quantified with NSAF and NSAF\_S. Proteins with shared peptide were accounted twenty five to forty percent of total protein.

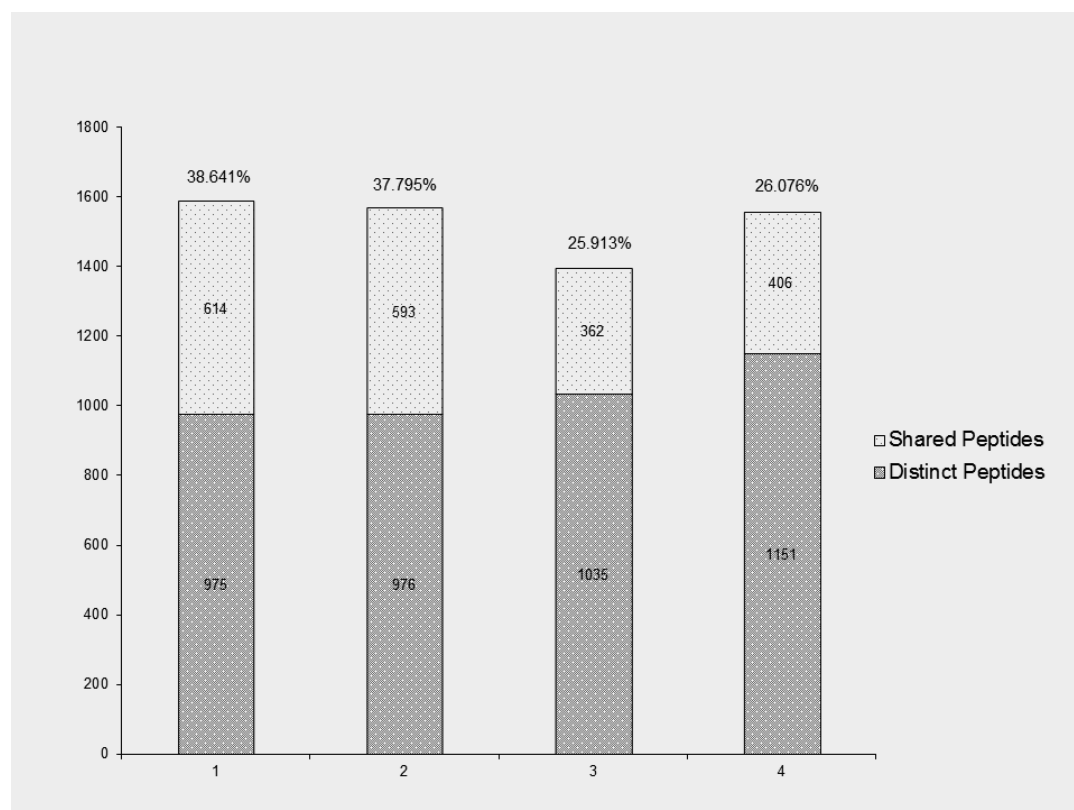

## Supplementary Notes

The freeQuant software tool is free available via <ftp://ftp.vico-lab.com/>.
